# Supplementary material for: Stage-specific muscle wasting mechanisms in a novel cancer cachexia mouse model for ovarian granulosa cell tumor
Source: bioRxiv or medRxiv preprint supplement (doi:10.1101/2020.06.16.154385), 2020-06-17

**Supplemental Figure 1.** (A) Breeding strategy for producing mice with constitutive PI3K activation in early-stage oocytes. (B) H&E staining of representative ovaries from a Cre<sup>-</sup> mouse (above) and a Cre<sup>+</sup> mouse (below) on PD60. The ovarian follicles were only in Cre<sup>-</sup> mice (blue arrows) and not in Cre<sup>+</sup> mice. Scale bar = 100 $\mu$ m. (C) MRI image of ovarian tumors (red arrows) in Cre<sup>+</sup> mouse (right) on PD60 and age-matched Cre<sup>-</sup> mouse (left). (D) Size of tumor (mm<sup>3</sup>) quantitated by MRI after PD50 (day 0). (E) Survival curve of Cre<sup>+</sup> and Cre<sup>-</sup> mice after PD60 (n=13). (F) Representative TA muscle on the hind limbs of Cre<sup>+</sup> mice after 15% weight loss (right) and age-matched Cre<sup>-</sup> mice (left). Tibialis anterior (TA) muscle are indicated by the black arrows. (G) Images of abdomen from Cre<sup>+</sup> mouse and age-matched Cre<sup>-</sup> mouse. Tumor is shown in Cre<sup>+</sup> mice (red arrow) and the fat pad disappears in the Cre<sup>+</sup> mouse compared with age-matched Cre<sup>-</sup> mouse (blue arrow). (H) MRI images of abdomen fat pad in a Cre<sup>-</sup> mouse (blue arrow) and Cre<sup>+</sup> mouse (red arrow).

**Supplemental Figure 2.** (A) RT-PCR analysis of *Caspase 3* in TA muscle collected from Cre<sup>+</sup> mice with 15% weight loss and age-matched Cre<sup>-</sup> mice (n=3). (B) Serum TNF- $\alpha$  levels in Cre<sup>+</sup> mice with weight loss from 5% to 20% (n=8). Non-paired t-test was used for statistical analysis by Prism 7 software. Data are shown as mean  $\pm$  s.d. of biological replicates. \* and \*\* represent  $P < 0.05$  and  $P < 0.01$ , respectively.

**Supplemental Figure 3.** (A) Percentage of body weight recorded daily for Cre<sup>+</sup> mice with PBS injection (n=3). (B) Percentage of body weight recorded daily for Cre<sup>+</sup> mice with Fst288 injection (n=3). (C) Correlation of *Murf1* mRNA expression and weight loss in Cre<sup>+</sup> mice (n=16). (D) Correlation of *Atrogin1* mRNA expression and weight loss in Cre<sup>+</sup> mice (n=16). (E) Correlation of *Lc3* mRNA expression and weight loss in Cre<sup>+</sup> mice (n=8). Statistical analysis was done by Spearman correlation using Prism 7 software. \*, and \*\* represent  $P < 0.05$  and  $P < 0.01$ , respectively.

**Supplemental Figure 4.** (A) RT-PCR analysis of *FoxO3* in skeletal TA muscle collected from Cre- mice with 16h fasting (n=3) and no fasting control (n=3). (B) RT-PCR analysis of *FoxO3* in skeletal TA muscle collected from Cre- mice with STZ-induced diabetes (n=3) and vehicle injection control (n=3). (C) Representative image of immunoblot of p-FOXO3, FOXO3, and  $\alpha$ -tubulin protein for the TA muscle lysate collected from Cre- mice with fasting and non-fasting controls, as well as Cre- mice with STZ-induced diabetes and vehicle injection control. (D-E) Quantification of densitometry analysis for immunoblot images for protein ratio of (D) p-FOXO3/FOXO3 and (E) FOXO3/ $\alpha$ -tubulin in Cre- mice with fasting and non-fasting control (n=3). (F-G) Quantification of densitometry analysis for immunoblot images for protein ratio of (F) p-FOXO3/FOXO3 and (G) FOXO3/ $\alpha$ -tubulin in Cre- mice with STZ-induced diabetes (n=3) and vehicle injection control (n=3) using ImageJ software. Non-paired t-test was used for statistical analysis by Prism 7 software. Data are shown as mean  $\pm$  s.d. of biological replicates. \*, \*\*, and \*\*\* represent  $P < 0.05$ ,  $P < 0.01$ , and  $P < 0.005$ , respectively.

**Supplemental Figure 5.** (A) Representative immunoblot of insulin receptor  $\beta$ , p-AKT, AKT, and  $\alpha$ -tubulin protein in TA muscle lysates collected from Cre+ mice with 15% weight loss and age-matched Cre- mice. (B) Quantification of glucose uptake by brown fat tissue in Cre+ mice (n=3) at the precachexia stage and (n=3) age-matched Cre- mice using  $^{18}\text{F}$ -FDG as tracer with the MRI scan images. Unpaired *t*-test was used to test statistical significance by Prism 7.

**Supplemental Figure 6.** (A) Representative immunoblots of p-p38 MAPK, p-38 MAPK and  $\alpha$ -tubulin protein in TA muscle lysates collected from Cre+ mice with 5% weight loss, Cre+ mice with 15% weight loss, and age-matched Cre- mice (n=3). (B) Representative immunoblots of p-FOXO3, FOXO3, and  $\alpha$ -tubulin protein in TA muscle lysates collected from Cre+ mice with 5% weight loss, Cre+ mice with 15% weight loss, and age-matched Cre- mice (n=3). (C)

Representative immunoblots of AMPK $\alpha$ , p-AMPK $\alpha$ , and  $\alpha$ -tubulin protein in TA muscle lysates collected from Cre<sup>+</sup> mice with 5% weight loss, Cre<sup>+</sup> mice with 15% weight loss, and age-matched Cre<sup>-</sup> mice (n=3).

# Supplemental Figure 1

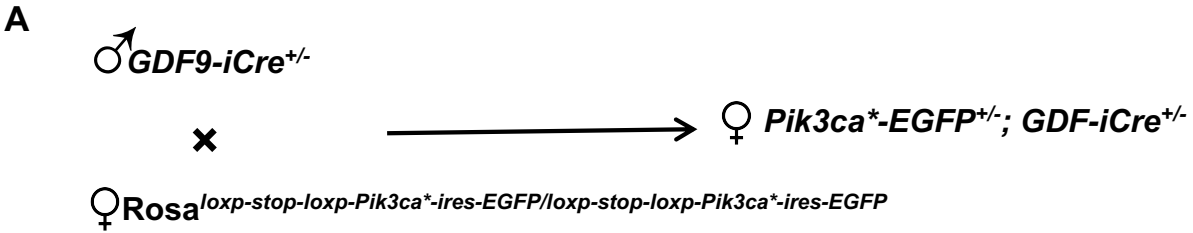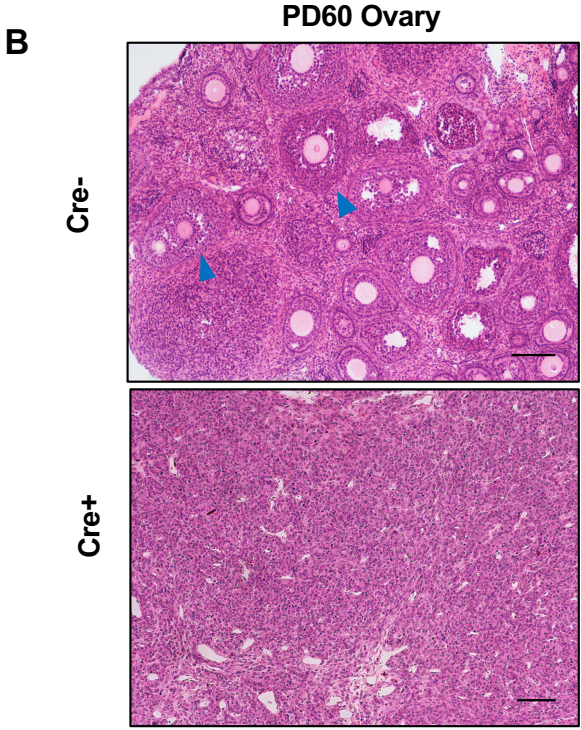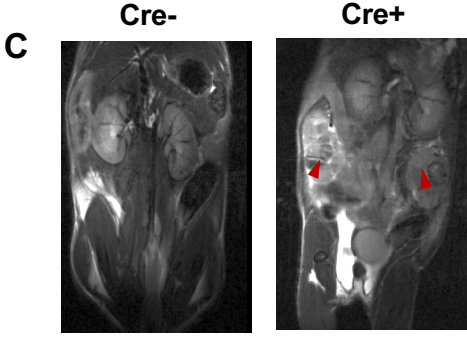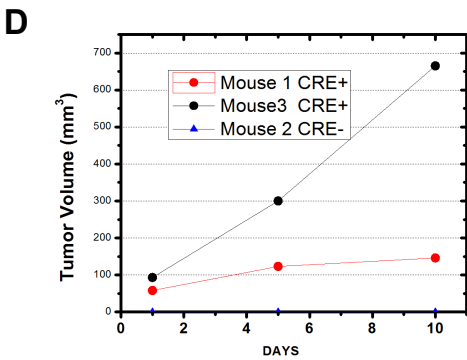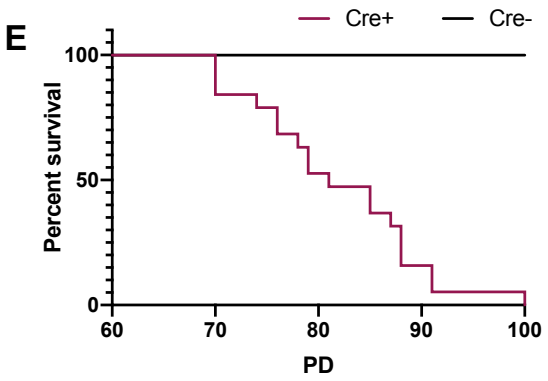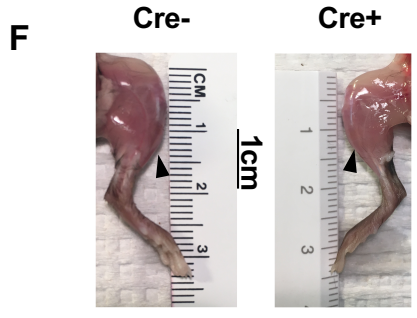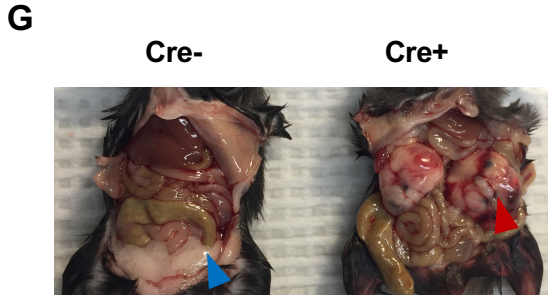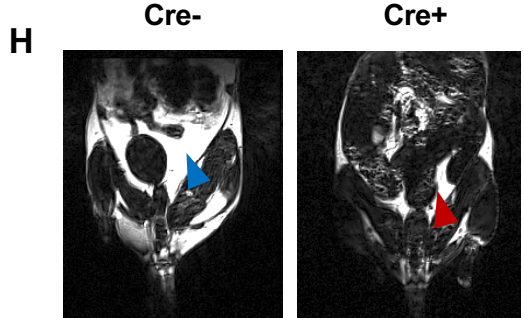



# Supplemental Figure 2

a

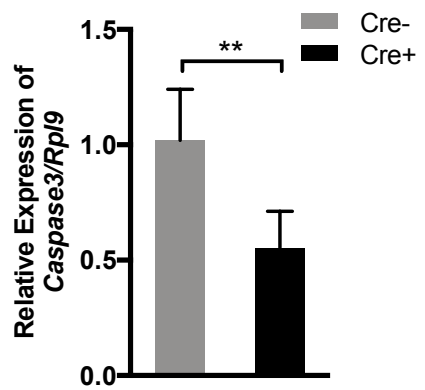

b

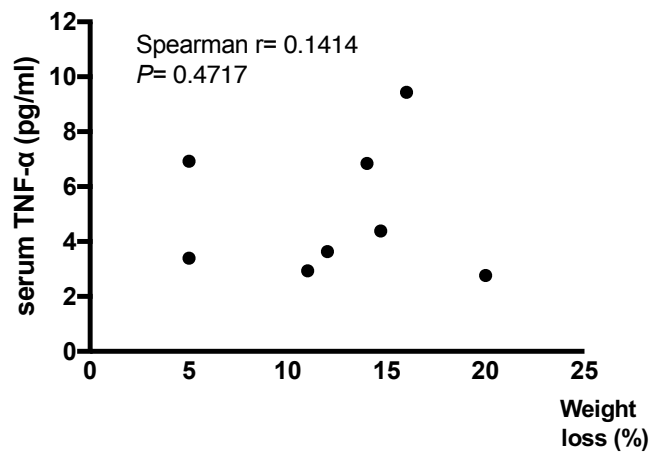

# Supplemental Figure 3

**A**

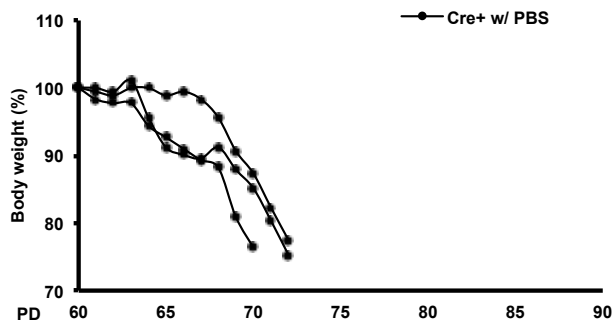

**B**

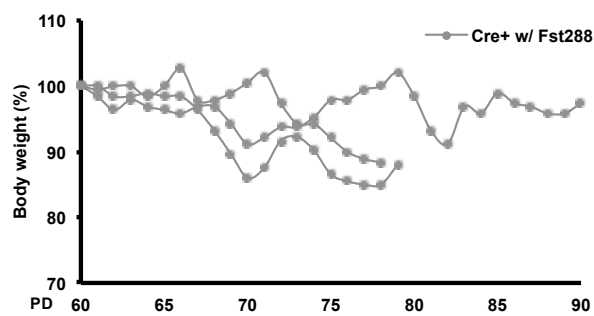

**C**

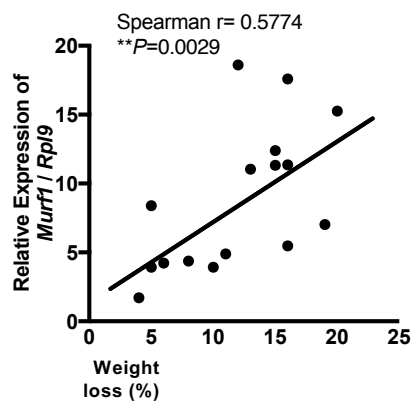

**D**

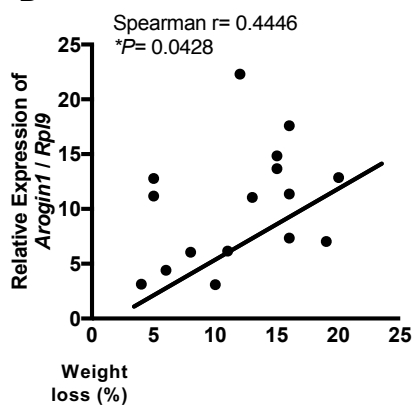

**E**

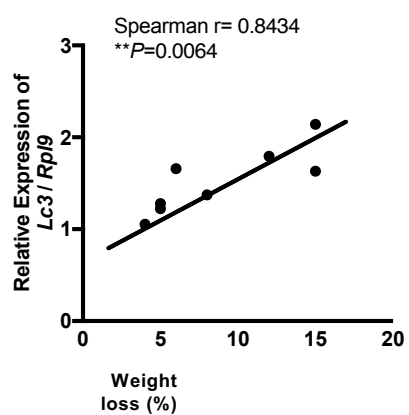

# Supplemental Figure 4

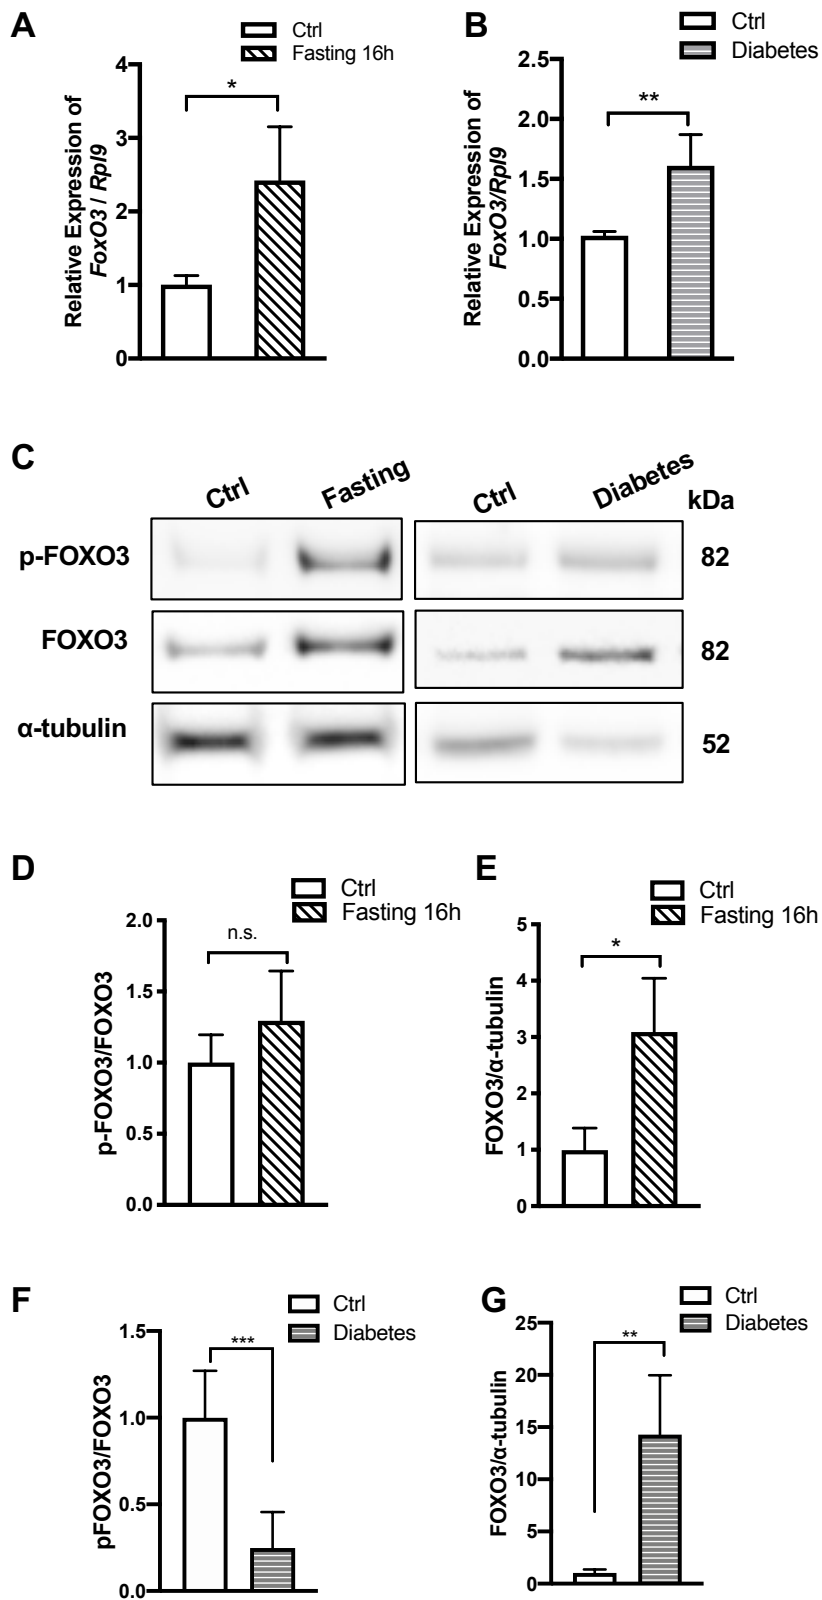

# Supplemental Figure 5

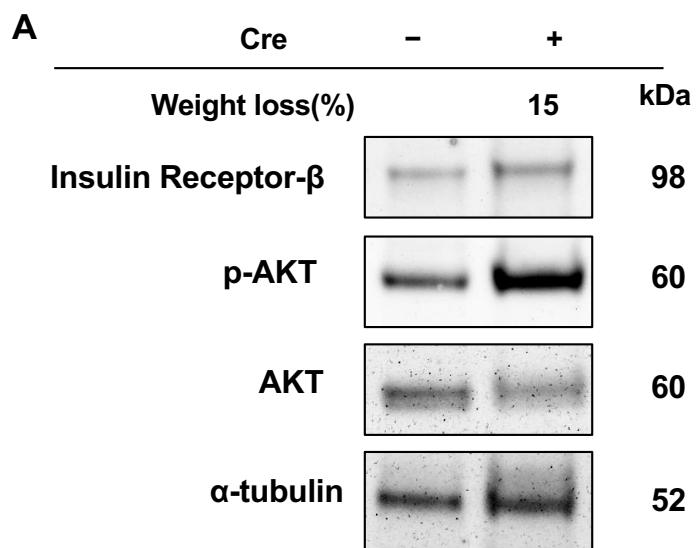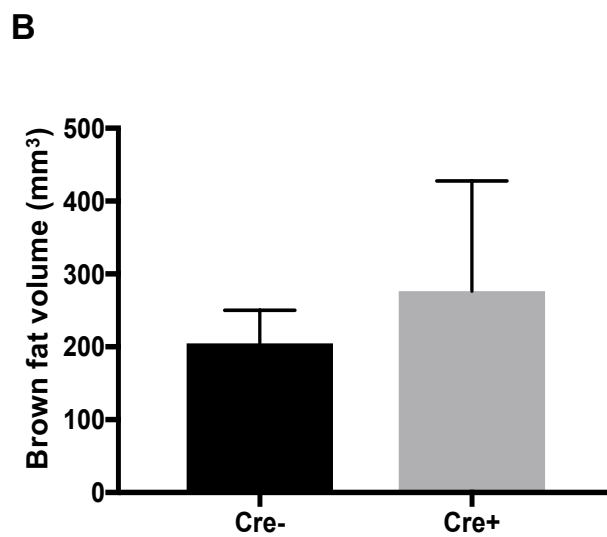

# Supplemental Figure 6

**A**

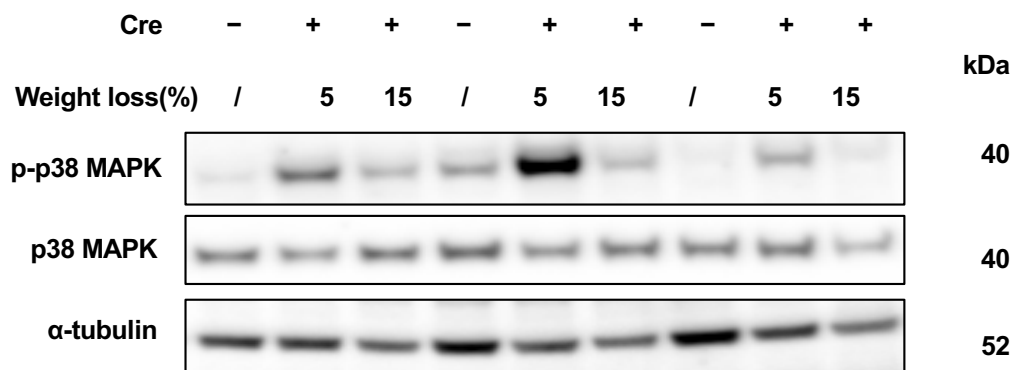

**B**

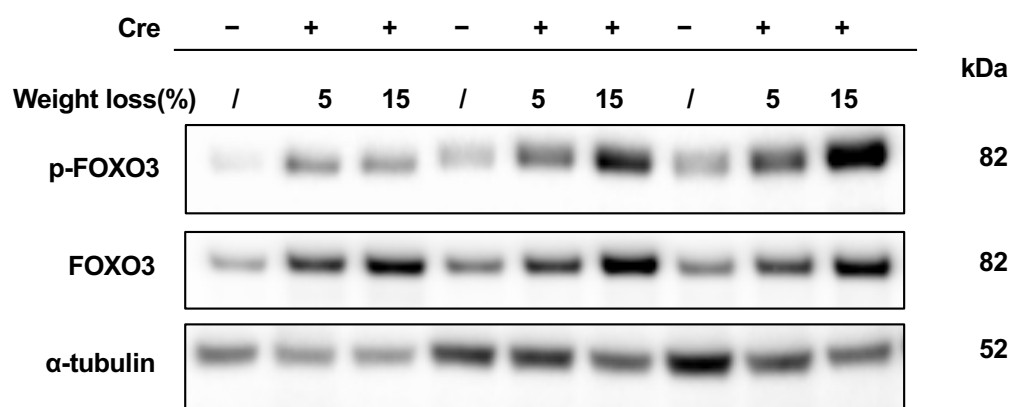

**C**

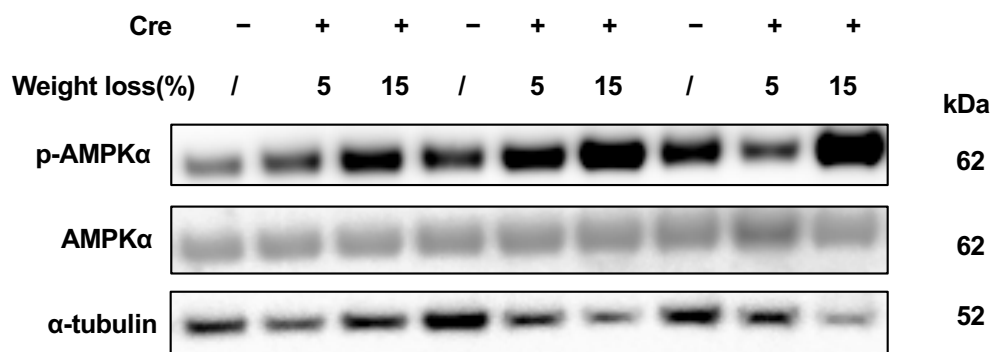

Supplement: Supplementary file [file media-1.pdf]
